# Supplementary material for: Future reduction of cold extremes over East Asia due to thermodynamic and dynamic warming
Source: Copernicus journal article supplement (doi:10.5194/egusphere-2023-2806), 2023-12-14

## Present-day cold-month SAT anomaly is dominated by dynamic component

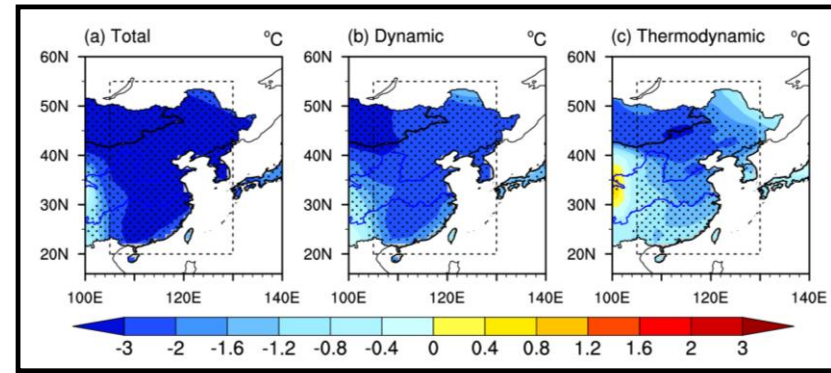

**Global Warming**

**AO-like circulation change**

**Thermodynamic change is the main contributor to cold-month STA future change and dynamic change is also contributive.**

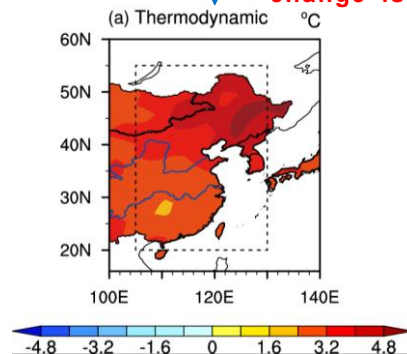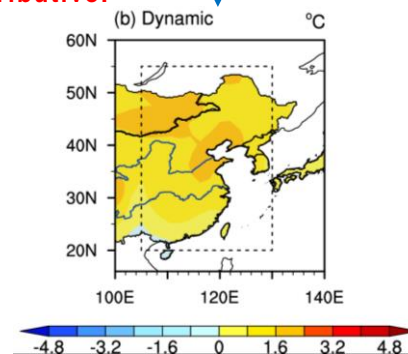

Supplement: Supplementary file 1 [file egusphere-2023-2806-supplement.pdf]
