# Supplementary material for: Future reduction of cold extremes over East Asia due to thermodynamic and dynamic warming
Source: Copernicus journal article supplement (doi:10.5194/egusphere-2023-2806), 2023-12-14
Supplement: Supplementary file [file egusphere-2023-2806-AC2-supplement.pdf]

**Reply to Reviewer #2:**

*all the comments and questions have been well addressed and revised in the current version, no further question on it.*

**Response:** Thank you very much. We appreciate your time and effort.
